# Supplementary material for: Protein-protein interaction networks identify targets which rescue the MPP+ cellular model of Parkinson’s disease
Source: PubMed Central journal article supplement (PMC4660280; doi:10.1038/srep17004), 2015-11-26

## Supplementary material:

### Protein-protein interaction networks identify targets which rescue the MPP<sup>+</sup> cellular model of Parkinson's disease

Harriet Keane<sup>†</sup>, Brent J. Ryan<sup>†</sup>, Brendan Jackson, Alan Whitmore and Richard Wade-Martins<sup>\*</sup>

#### Supplementary Figure 1: Expression of network targets is unaltered following MPP<sup>+</sup> exposure.

Expression of networks targets was unaltered following MPP<sup>+</sup> exposure. (a-c) Protein levels of network targets was assessed by western blot following MPP<sup>+</sup> treatment (48 h, 100  $\mu$ M) (d) RNA was harvested from control and MPP<sup>+</sup> treated cells and analysed using Human Gene 2.0 ST Arrays. Probe signal correlates with gene expression. mRNA expression of network targets was unaltered. (e-g) The effect of MPP<sup>+</sup> on protein levels of network targets was quantified by western blots with band intensities normalised relative to actin. Bars represent mean  $\pm$  SEM (n=3).

#### Supplementary Figure 2: MPP<sup>+</sup> induces cell death in a time and dose dependent manner via mitochondrial membrane depolarisation.

Cellular viability following MPP<sup>+</sup> treatment. (a) Cell viability was assessed by the MTS assay following MPP<sup>+</sup> treatment. (b and c) Cell death was assessed by counting the number of morphologically normal cells in bright field images following MPP<sup>+</sup> treatment. (20 x magnification, scale bar is 100  $\mu$ m). (d) MPP<sup>+</sup> (100  $\mu$ M, 5h) increases lysosomal pH as assessed by neutral red accumulation. The vacuolar-type H<sup>+</sup>-ATPase inhibitor bafilomycin A1 (50 nm, 5h) was used as a positive control for lysosomal deacidification. (e) Cell viability was assessed by neutral red in normal or low glucose media following MPP<sup>+</sup> treatment (100  $\mu$ M). (f) Cellular ATP was also measured in normal or low glucose media following MPP<sup>+</sup>

treatment (100  $\mu$ M). In low glucose, high galactose media there is no net release of ATP from glycolysis and energy production is entirely dependent on oxidative phosphorylation as evidenced by potentiation of MPP<sup>+</sup> toxicity in low glucose conditions. (g) Mitochondrial membrane polarisation was measured using TMRM fluorescence following MPP<sup>+</sup> treatment (5 or 100  $\mu$ M). Data points represent mean values normalised to untreated control cells  $\pm$  SEM (n=3), \*= P  $\leq$ 0.05, \*\*\*=P  $\leq$ 0.001 compared to untreated controls.

### **Supplementary Figure 3: Overexpression of GABARAP subfamily proteins.**

Cells were transfected with GABARAP-EGFP subfamily fusion protein constructs. (a) Cells were imaged 72 h after transfection with either individual constructs or the combination of GABARAP, GBRL1 and GBRL2 (20 x magnification, scale bars are 70  $\mu$ m). (b) Fluorescent cells were counted and the proportion of fluorescent cells was calculated. Bars represent mean  $\pm$  SEM (n=3). (c) Extended blots (originally shown in *Figure 3b*) demonstrating both endogenous and GFP fusion forms of the GABARAP proteins 72 h after indicated transfection.

### **Supplementary Figure 4: MPP<sup>+</sup> causes autophagosome accumulation associated with failed degradation.**

Autophagic flux following MPP<sup>+</sup> treatment measured using LC3B lipidation and pulse-chase assay. (a and b) Cells treated with MPP<sup>+</sup> and/or bafilomycin were harvested 48 h after treatment. LC3B levels were measured by western blot and the ratio of LC3B-II to LC3B-I calculated. Bars represent mean  $\pm$  SEM (n=3), \*= P  $\leq$ 0.05. (c) The rate of protein degradation in <sup>14</sup>C labelled cells was measured following treatment with MPP<sup>+</sup> (100  $\mu$ M) or rapamycin (1  $\mu$ M), linear regression was performed and lines plotted.

**Supplementary Table 1: Mitochondrial seed proteins.**

Proteins which have independently been experimentally shown to contribute to mitochondrial dysfunction in an MPP<sup>+</sup> model.

**Supplementary Table 2: Autophagy seed proteins.**

Proteins which have independently been experimentally shown to contribute to alterations in autophagy following MPP<sup>+</sup> treatment.

## Tables

**Supplementary Table 1**

| <b>Protein</b>                        | <b>Function</b>                                                                                                                                       |
|---------------------------------------|-------------------------------------------------------------------------------------------------------------------------------------------------------|
| Heat shock protein 75 kDa             | Phosphorylated by PINK1, mitochondrial analogue of Hsp90, binds to TNF type 1 receptor associated protein <sup>43</sup> .                             |
| Dynamin-1-like protein                | A key mediator of mitochondrial fission <sup>44</sup> .                                                                                               |
| Transcription factor A, mitochondrial | Mitochondrial transcription factor. Pro-survival. Decreases ROS production <sup>45</sup> .                                                            |
| Bax                                   | Proapoptotic, cytosolic protein which inserts into membranes upon apoptotic stimuli. Regulated by p53 <sup>46</sup>                                   |
| Parkin                                | Ubiquitin ligase. Removes abnormally folded proteins. Downstream of PINK1. Important for mitochondrial fission <sup>47-49</sup> .                     |
| DJ-1                                  | Removes reactive oxygen species. Involved of regulation of mitochondrial dynamics though DLP <sup>50,51</sup> .                                       |
| HTRA2                                 | Mitochondrial serine protease, relocates to cytosol leading to initiation of apoptosis <sup>52</sup> .                                                |
| VDAC1                                 | Voltage-gated anion channel, regulates ion transport between mitochondria and cytosol <sup>53</sup> .                                                 |
| PINK1                                 | A kinase important for the activation of parkin-mediated mitophagy, in addition to parkin-independent roles in mitochondrial dynamics <sup>8,54</sup> |

**Supplementary Table 2**

| <b>Protein</b>                                              | <b>Function</b>                                                                                                                                                                                                                            |
|-------------------------------------------------------------|--------------------------------------------------------------------------------------------------------------------------------------------------------------------------------------------------------------------------------------------|
| Microtubule-associated proteins 1A/1B light chain 3B (LC3b) | Lipidated upon the induction of autophagy and a key component of the autophagosome membrane <sup>55</sup> .                                                                                                                                |
| LAMP2A                                                      | Lysosomal membrane glycoprotein, interacts with HSC70 to facilitate chaperone-mediated autophagy (CMA) of substrates including $\alpha$ -syn. Post-translationally modified or mutant forms of $\alpha$ -syn impair CMA <sup>56,57</sup> . |
| Hsc70-interacting protein                                   | An adaptor protein which facilitates the transport of CMA substrates through LAMP2a. Hsc70 recognises a pentapeptide sequence on CMA substrates <sup>58</sup> .                                                                            |
| Ambra1                                                      | Activator of autophagy stabilized by autophagic stimuli by disrupting cullin-4 interaction <sup>59</sup>                                                                                                                                   |
| Beclin-1                                                    | An Atg6 orthologue important for initiation of autophagy. Beclin-1 has several domains facilitating its interaction with pro-autophagy/pro-apoptosis molecules indicating its role in determination of cell fate <sup>60</sup>             |
| UCHL1                                                       | Ubiquitin carboxy-terminal hydrolase L1, an enzyme abundant in neurons which catalyses the hydrolysis of C-terminal ubiquitin adducts, facilitating ubiquitin monomer formation and hence ubiquitin dynamics <sup>61</sup>                 |
| P35                                                         | Neuronal-specific CDK5 activator, regulation of protein activity occurs primarily through post-translational calpain cleavage <sup>62</sup>                                                                                                |

Supplementary Figure 1

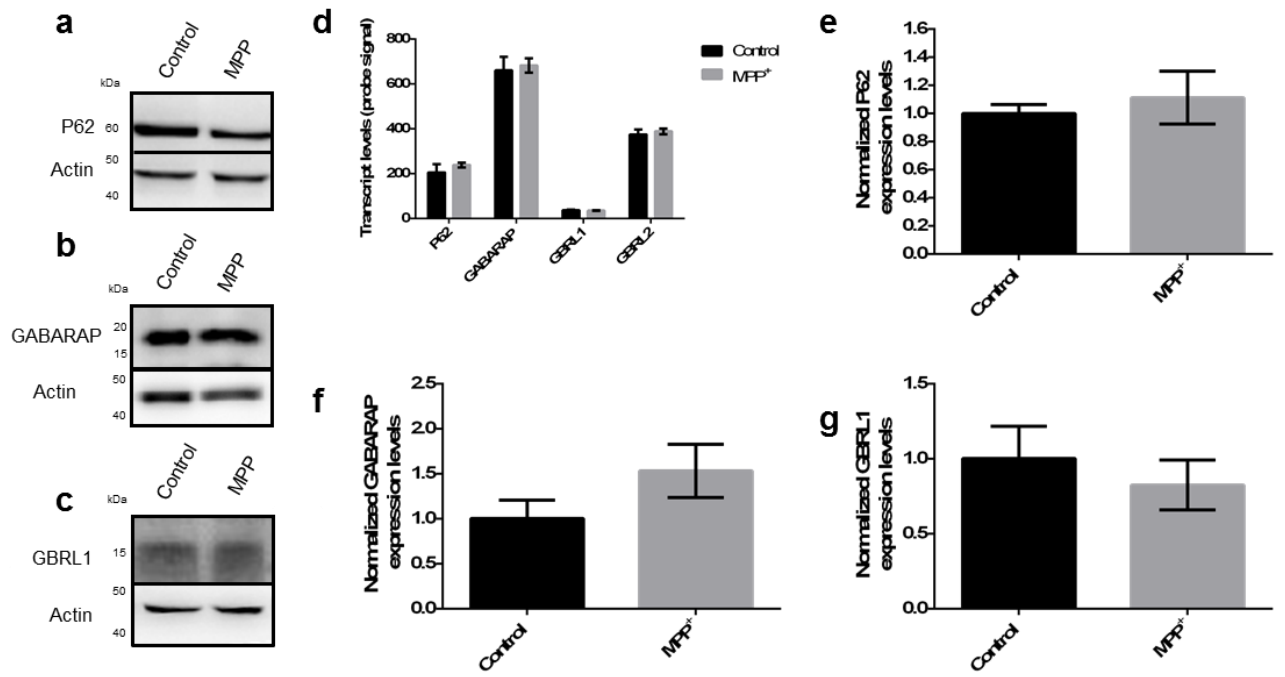

Supplementary Figure 2

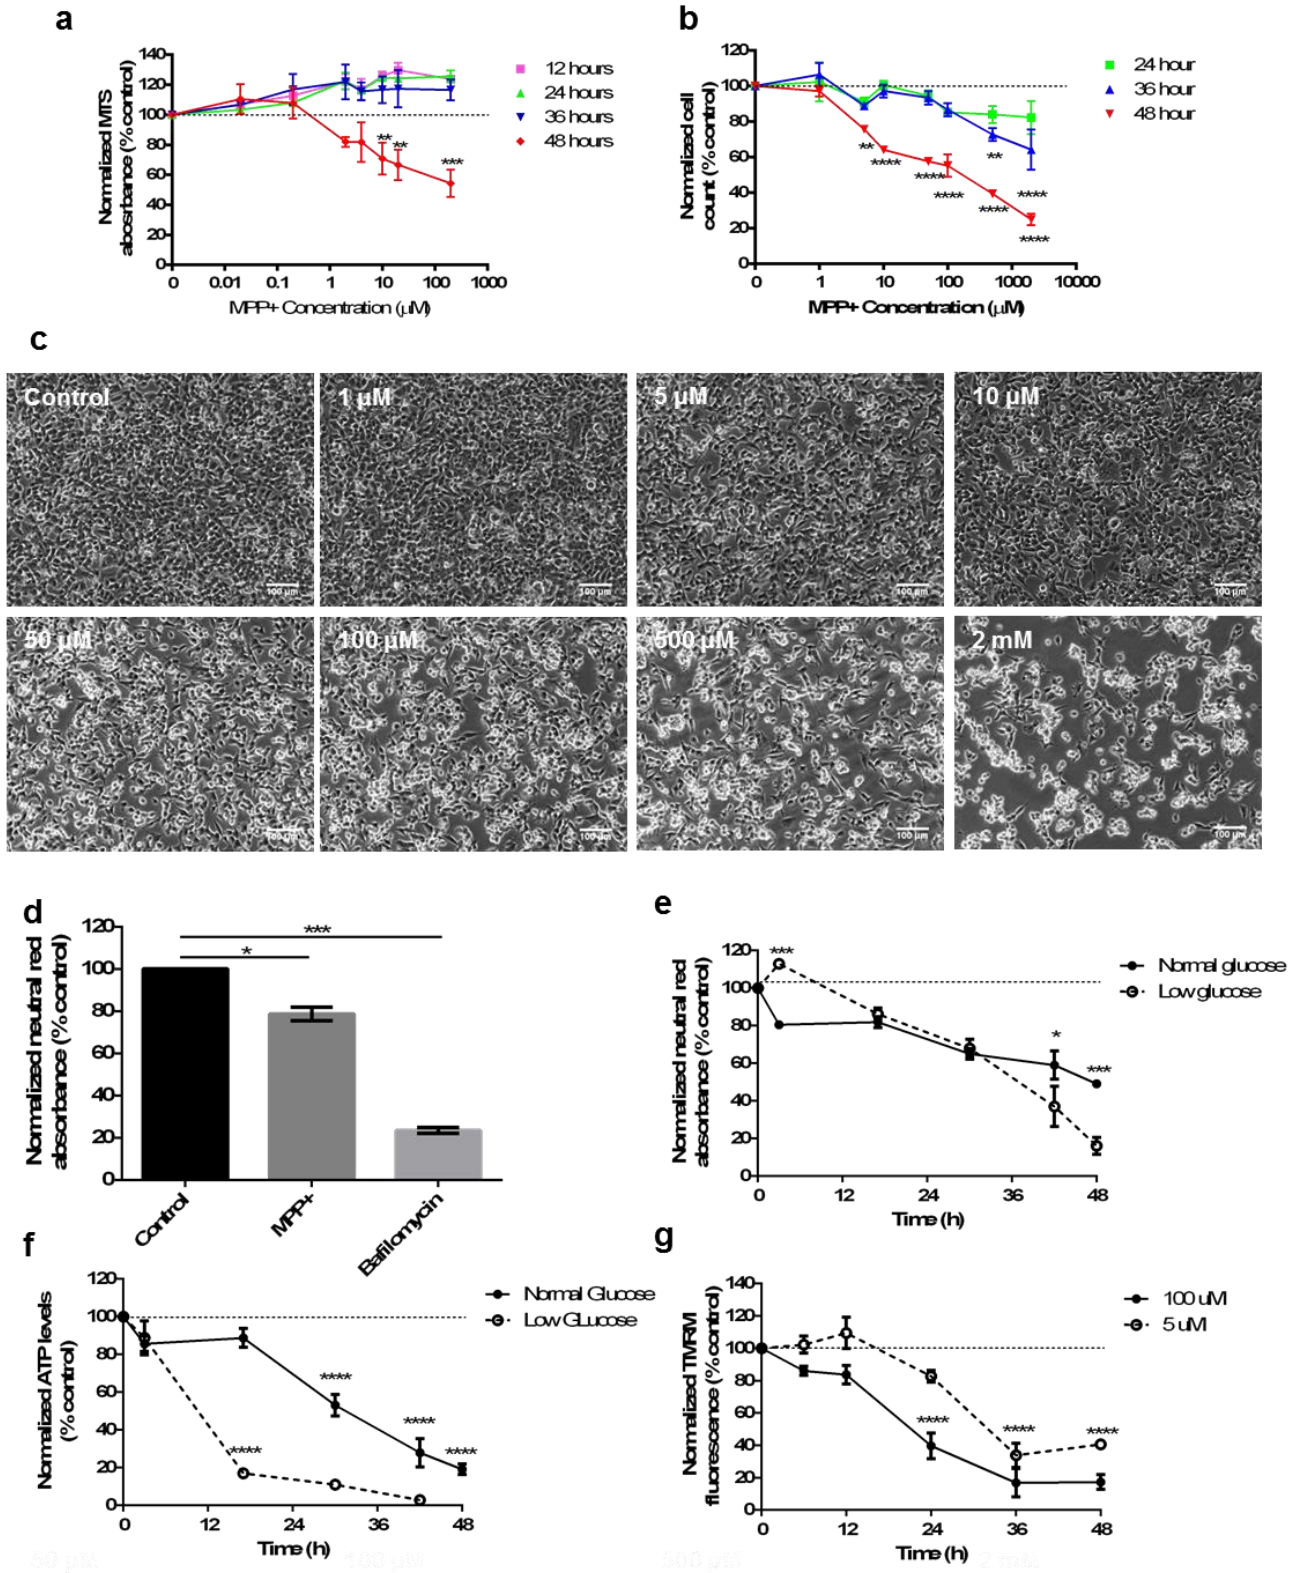

Supplementary Figure 3

**a**

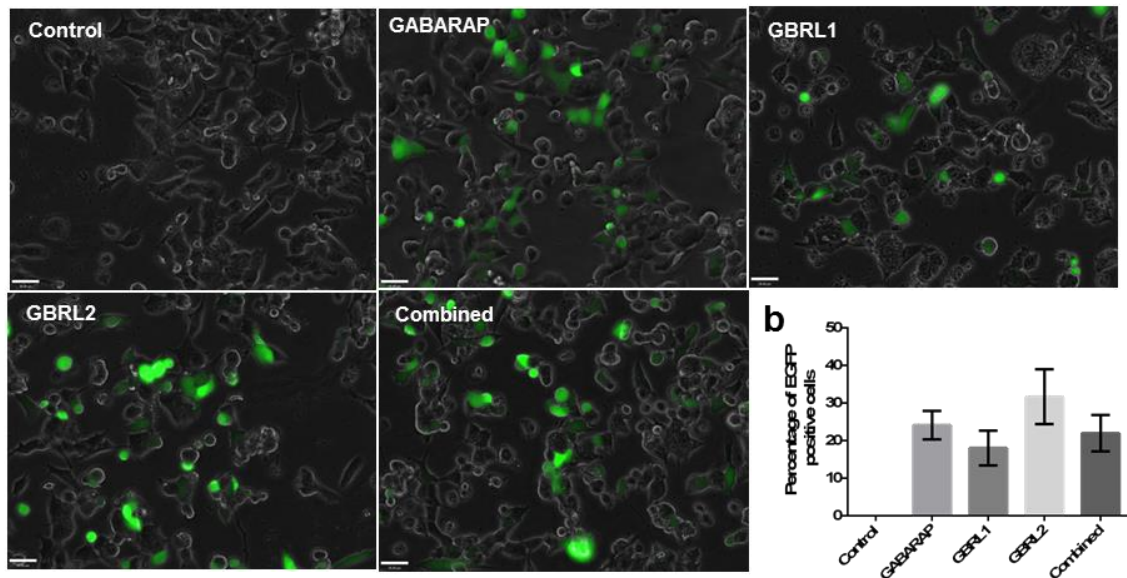

**c**

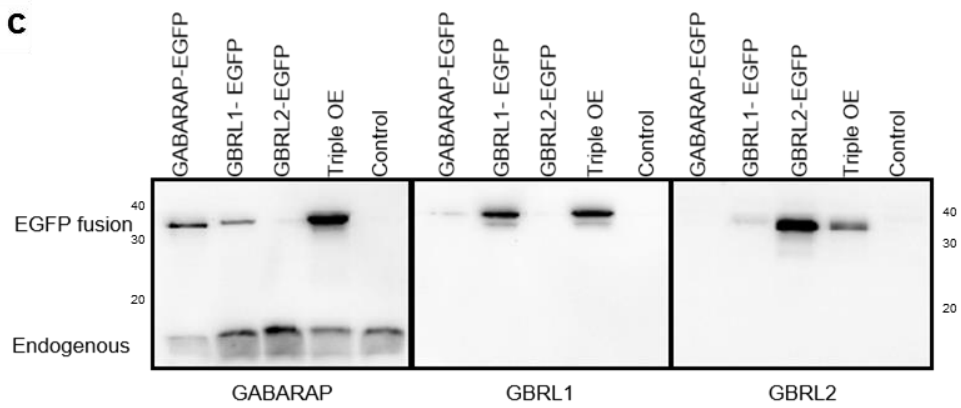



Supplementary Figure 4

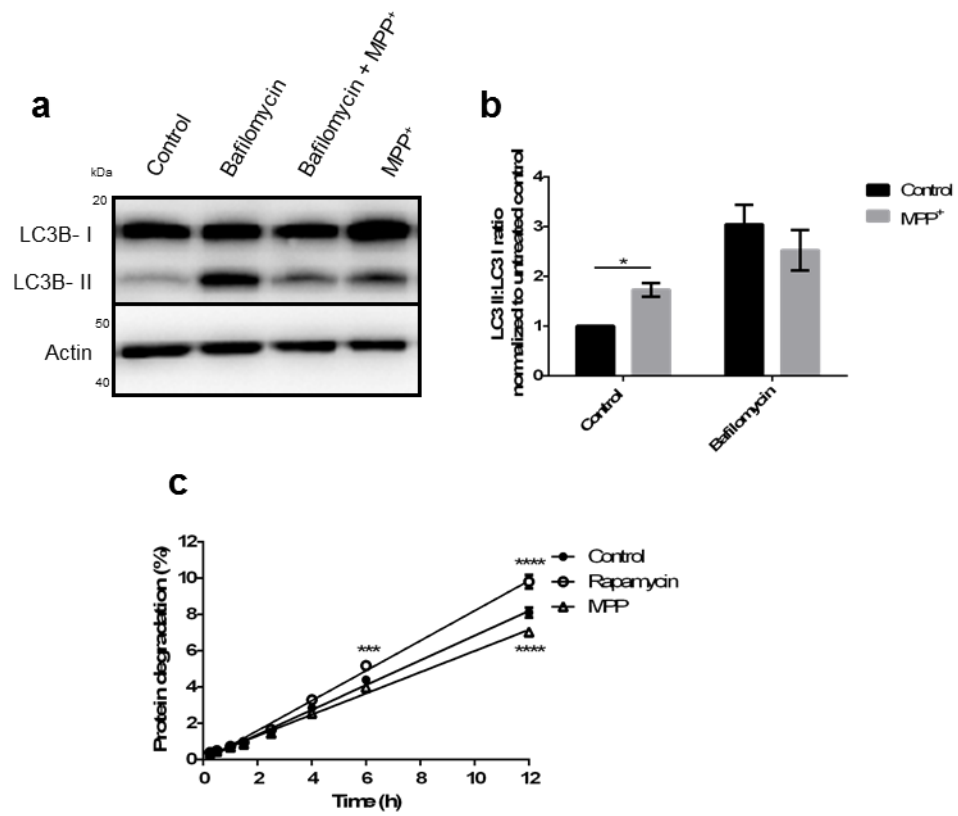

Supplement: srep17004-s1.pdf [file srep17004-s1.pdf]
